# Supplementary material
Source: MDPI journal article supplement (https://www.mdpi.com/2073-4441/13/7/903)
Supplement: s1 [file s1]

## Supplementary Material

# Onsite Chlorination of Greywater in a Vertical Flow Constructed Wetland—Significance of Trihalomethane Formation

Anat Bernstein, Hagar Siebner, Andrew Kaufman and Amit Gross \*

Department of Environmental Hydrology and Microbiology (EHM), The Zuckerberg Institute for Water Research (ZIWR), The Jacob Blaustein Institutes for Desert Research, Ben-Gurion University of the Negev, Israel; anatbern@bgu.ac.il (A.B.); siebner@bgu.ac.il (H.S.); andrewka@post.bgu.ac.il (A.K.)

\* Correspondence: amgross@bgu.ac.il

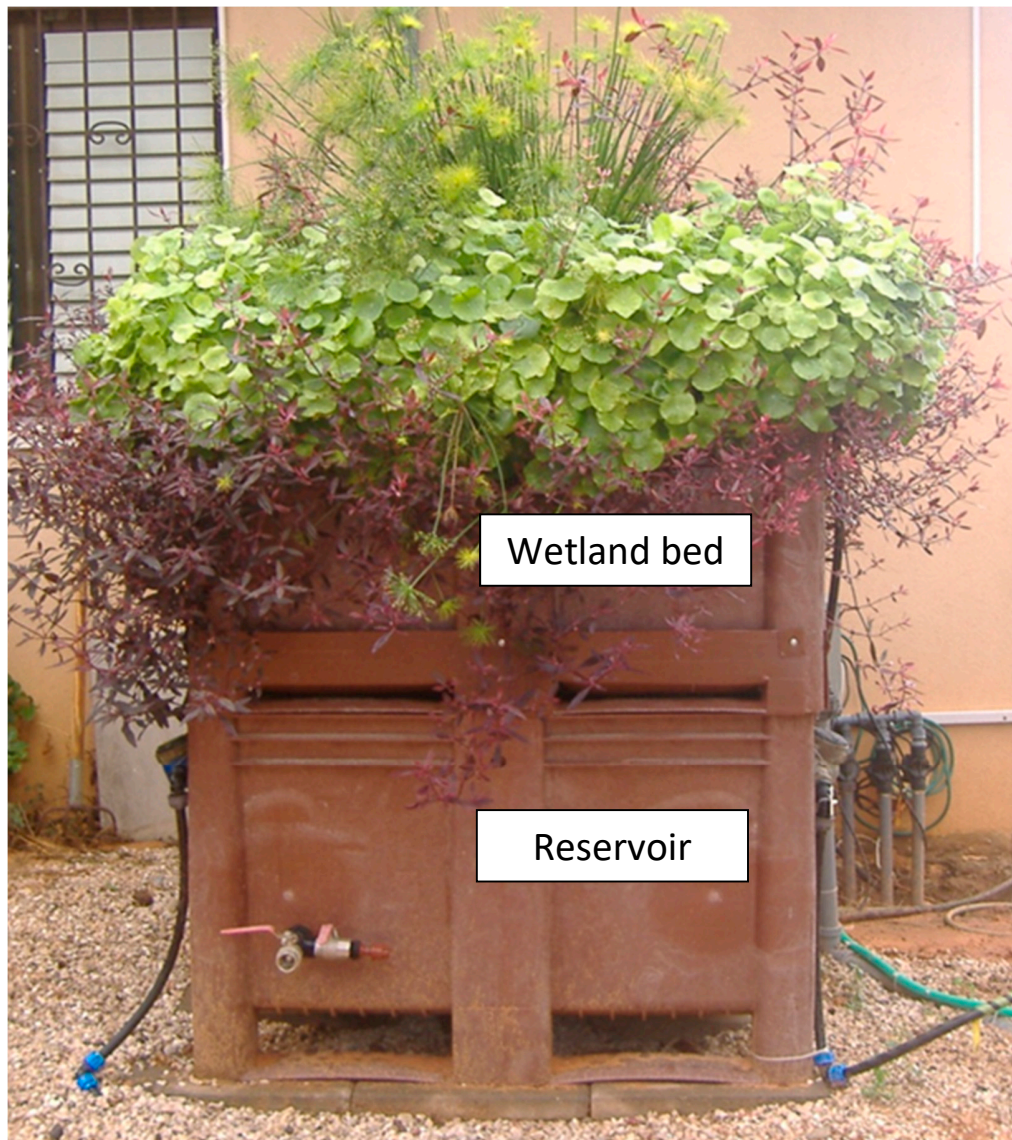

**Figure S1.** A recirculating vertical flow constructed wetland system

**Table S1.** Chlorine yield as THM for system S5 water that was incubated with 5 mg/l chlorine for 1 h. Yield was calculated as the ratio of chlorine recovered in THM versus chlorine consumed

| Sample | Circulation time (h) | Residual chlorine after 1 h (mg/l) | Chlorine consumed in 1 h (mg/l) | Chlorine recovered in THM (µg/l) | Chlorine yield as THM (-) |
|--------|----------------------|------------------------------------|---------------------------------|----------------------------------|---------------------------|
| B1     | 0                    | 0.39                               | 4.61                            | 15.0                             | 0.0033                    |
| B2     | 0.5                  | 0.84                               | 4.16                            | 14.9                             | 0.0036                    |
| B3     | 1                    | 1.61                               | 3.39                            | 8.7                              | 0.0026                    |
| B4     | 3                    | 3.02                               | 1.98                            | 21.5                             | 0.0109                    |
| B5     | 6                    | 2.89                               | 2.11                            | 111.3                            | 0.0527                    |
